# Supplementary material
Source: publisher figshare collection journal article supplement (https://acs.figshare.com/ndownloader/files/4643740)
Supplement: Supplementary file 1 [file 4643740]

# Head Group Modulated pH-Responsive Hydrogel of Amino Acid-Based Amphiphiles: Entrapment and Release of Cytochrome c and Vitamin B<sub>12</sub>

Anshupriya Shome, Sisir Debnath, and Prasanta Kumar Das<sup>\*†</sup>

*Department of Biological Chemistry, Indian Association for the Cultivation of Science  
Jadavpur, Kolkata – 700 032, India.*

<sup>†</sup>Also at Centre for Advanced Materials, Indian Association for the Cultivation of Science.

## Supporting information

### List of supporting information

**Figure S1.** <sup>1</sup>H NMR spectra of amide proton of gelator **3** (4%, w/v) in [D<sub>6</sub>]DMSO with varying water content.

**Figure S2.** 2D-NOESY spectra of gelator **4** (4 %, w/v) in [D<sub>6</sub>]DMSO with 70% water.

**Figure S3.** Temperature dependent CD spectra of gelator **2** (0.025%, w/v).

**Figure S4.** Temperature dependent CD spectra of Gelator **3** (0.025%, w/v).

**Figure S5.** Temperature dependent CD spectra of Gelator **4** (0.025%, w/v).

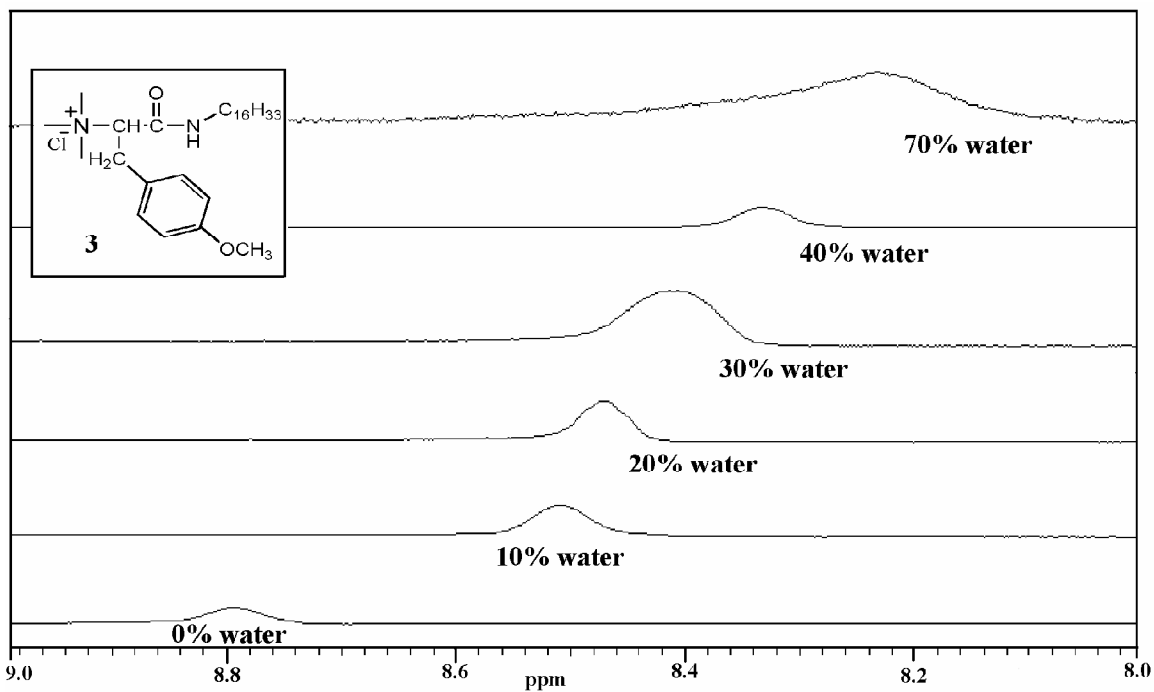

**Figure S1.** <sup>1</sup>H NMR spectra of amide proton of gelator **3** (4%, w/v) in [D<sub>6</sub>]DMSO with varying water content.

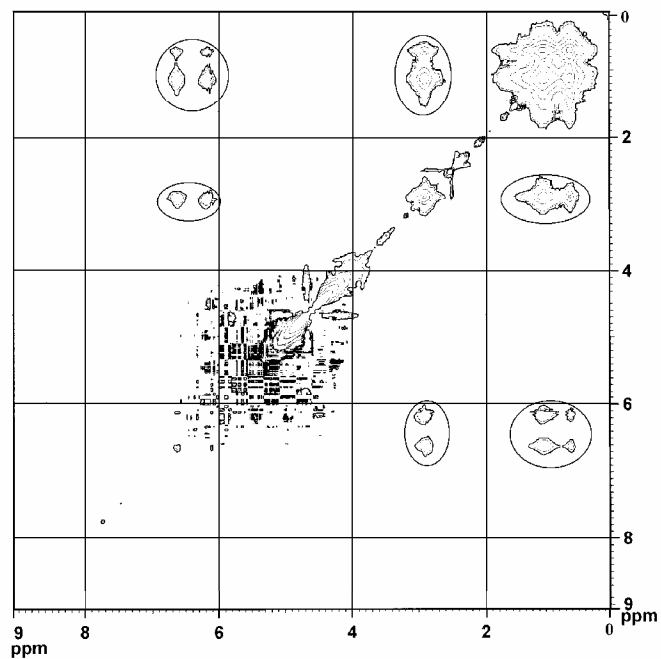

**Figure S2**, 2D-NOESY spectra of gelator **4** (4 %, w/v) in  $[D_6]$ DMSO with 70% water.

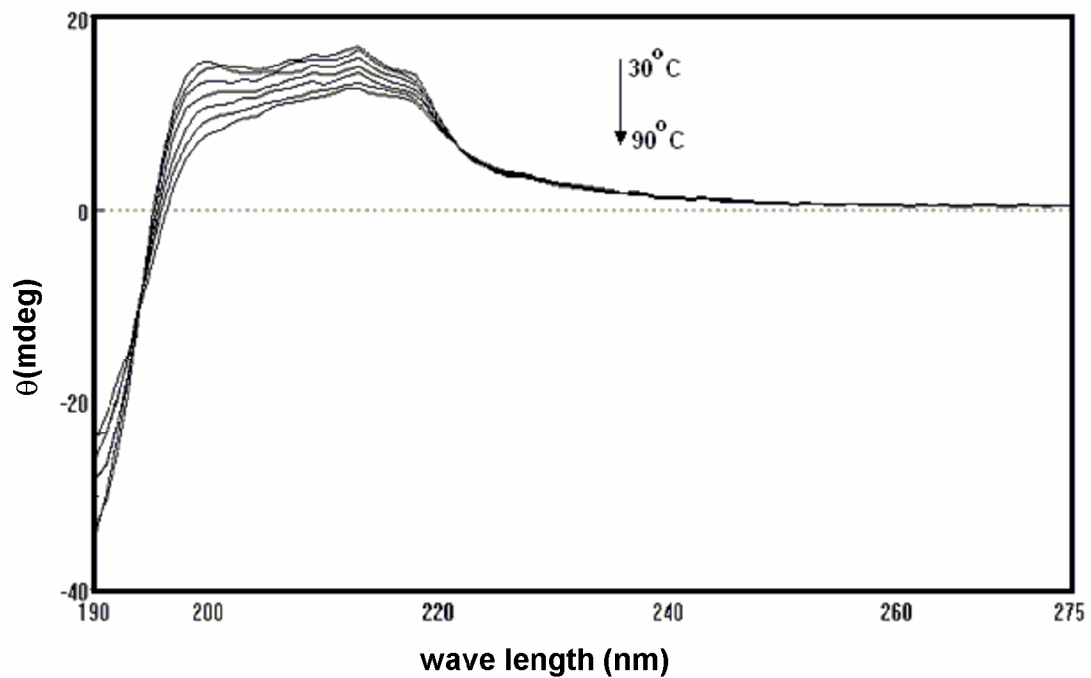

**Figure S3.** Temperature dependent CD spectra of gelator **2** (0.025%, w/v).

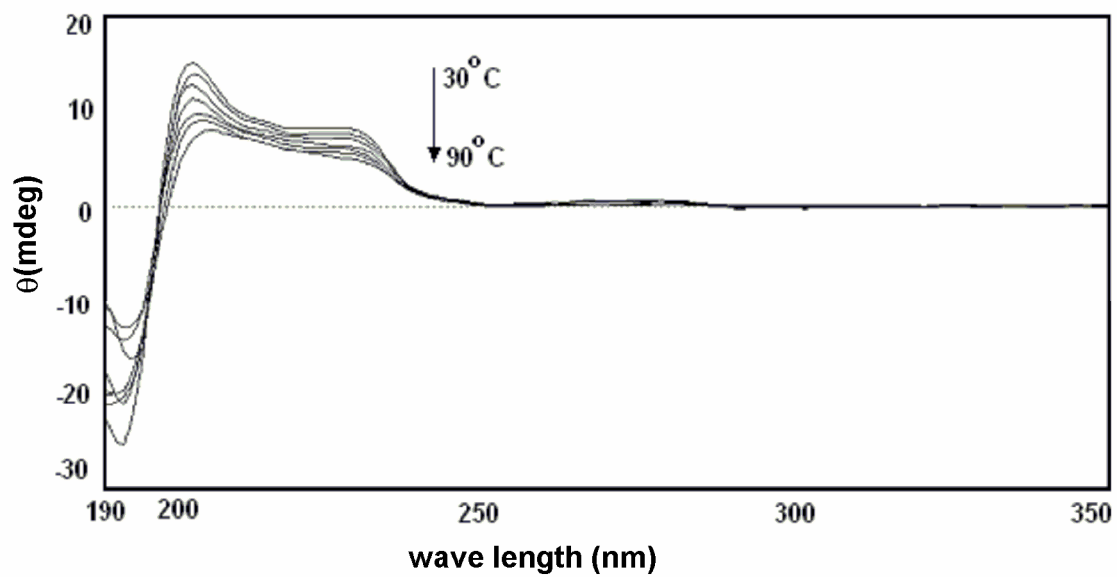

**Figure S4.** Temperature dependent CD spectra of Gelator **3** (0.025%, w/v).

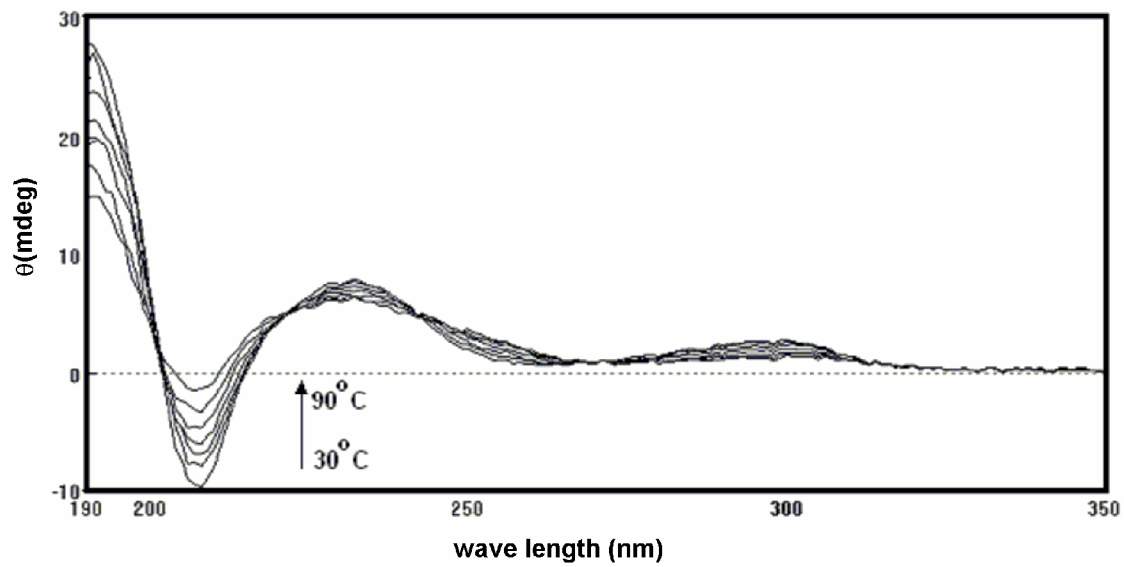

**Figure S5.** Temperature dependent CD spectra of Gelator **4** (0.025%, w/v).
